# Supplementary material
Source: publisher figshare collection journal article supplement (https://karger.figshare.com/ndownloader/files/13001231)
Supplement: Supplementary file 1 [file 13001231]

**Table S2: Regulation of selected genes in glomeruli, cortical tubulointerstitium and whole kidney.** Fold change for NTN mice in comparison to control mice for each structure on day 7, 21 and 42 is shown. Values with p < 0.05 after correction for multiple testing are highlighted in red (upregulated) or green (downregulated). Empty cells indicate that the gene is not statistically significant regulated between NTN and control mice. The genes marked with an asterisk indicate low gene expression counts from the nCounter NanoString analysis.

|  |  |  | **Kidney** | | | **Glomeruli** | | | **Cortical Tubulointerstitium** | | |
| --- | --- | --- | --- | --- | --- | --- | --- | --- | --- | --- | --- |
|  |  | Gene | Day 7 | Day 21 | Day 42 | Day 7 | Day 21 | Day 42 | Day 7 | Day 21 | Day 42 |
| Mesangial Expansion |  | ***Pdgfra*** | 0.6 | 0.7 | 0.8 | 0.4 | 0.5 | 0.6 | 0.4 | 0.8 | 1.0 |
| Kidney Injury |  | ***Havcr1*** | 4.4 | 4.6 | 1.5 | 20.7 | 5.3 | 0.6 | 20.8 | 6.6 | 10.3 |
|
| Inflammation | Complement System | ***C5ar1*** | 2.5 | 1.5 | 1.4 | 1.4 | 1.9 | 1.6 | 1.3 | 2.5 | 1.4 |
|
| Chemokine and adhesion molecules | ***Ccl5*** | 2.4 | 1.9 | 1.9 | 1.2 | 1.0 | 1.9 | 2.2 | 2.5 | 1.5 |
| ***Pecam1*** | 0.5 | 0.5 | 0.7 | 0.4 | 0.4 | 0.4 | 0.4 | 0.4 | 0.5 |
| ***s100a8**** | 0.5 | 0.4 | 0.6 | 0.6 | 0.9 | 0.8 | 0.2 | 0.1 | 0.1 |
| Immune cell subsets | ***Adgre1*** | 1.3 | 1.4 | 1.3 | 2.9 | 4.7 | 1.1 | 2.3 | 3.4 | 3.2 |
| ***Cd3d*** | 0.9 | 1.2 | 1.4 | 1.1 | 0.1 | 0.4 | 9.2 | 5.6 | 5.3 |
| ***Elane**** | 1.1 | 1.1 | 0.8 | 0.5 | 0.7 | 0.9 | 0.7 | 0.4 | 0.5 |
| ***Itgam*** | 2.7 | 2.9 | 2.0 | 1.2 | 0.7 | 2.2 | 23.4 | 20.1 | 5.7 |
| ***Mpo**** | 1.8 | 2.1 | 1.5 | 0.5 | 0.7 | 0.9 | 0.4 | 0.4 | 0.3 |
| ***Thy1*** | 1.2 | 1.2 | 1.1 | 0.5 | 1.4 | 1.8 | 3.6 | 9.2 | 15.2 |
| Cytokines | ***Il1b*** | 0.9 | 0.8 | 0.9 | 1.2 | 0.5 | 0.3 | 0.4 | 0.4 | 0.4 |
| ***Il6*** | 4.0 | 4.2 | 1.7 | 0.5 | 1.3 | 0.6 | 0.5 | 1.1 | 1.0 |
| ***Tnf*** | 3.0 | 3.8 | 2.3 | 0.3 | 0.4 | 0.7 | 1.9 | 12.7 | 1.9 |
| Fibrosis | Degradation of ECM | ***Mmp9*** | 0.8 | 0.7 | 1.1 | 0.6 | 0.8 | 2.1 | 0.5 | 0.5 | 0.9 |
| Inhibition of ECM degradation | ***Serpine-1*** | 2.2 | 1.6 | 1.2 | 10.4 | 4.3 | 2.1 | 5.2 | 5.4 | 4.3 |
| Positive regulators of fibrogenesis | ***Tgfbr2*** | 0.6 | 0.7 | 0.8 | 0.4 | 0.4 | 0.5 | 0.5 | 0.4 | 0.5 |
| Proliferation and apoptosis |  | ***Perp*** | 0.4 | 0.4 | 0.6 | 2.2 | 1.3 | 1.1 | 0.2 | 0.1 | 0.2 |
|  | ***Klf4*** | 0.7 | 0.6 | 0.8 | 0.6 | 0.5 | 0.5 | 1.3 | 1.3 | 1.8 |
|  | ***Mki67*** | 3.5 | 1.7 | 1.3 | 0.8 | 0.8 | 0.8 | 0.9 | 0.7 | 1.0 |
